# Supplementary material for: A CDAHFD-induced mouse model mimicking human NASH in the metabolism of hepatic phosphatidylcholines and acyl carnitines
Source: Royal Society of Chemistry journal article supplement (doi:10.1039/d3fo05111k), 2024-01-01
Supplement: d3fo05111k1.pdf [file d3fo05111k1.pdf]

## **CDAHFD-induces a NASH model mimicking the clinic in the metabolism of hepatic phosphatidylcholines and acyl carnitines**

Jie Yang,<sup>‡<sup>a</sup></sup> Manyun Dai, <sup>‡<sup>b</sup></sup> Ying Wang,<sup>b</sup> Zheng Yan,<sup>b</sup> Shuqi Mao,<sup>a</sup> Aiming Liu<sup>\*<sup>b</sup></sup> and Caide Lu<sup>\*<sup>a</sup></sup>

<sup>a</sup> Department of Hepatopancreatobiliary Surgery, the Affiliated Lihuili Hospital, Ningbo University, Ningbo 315040, China

<sup>b</sup> Zhejiang Key Laboratory of Pathophysiology, Department of Physiology and Pharmacology, Health Science Centre, Ningbo University, Ningbo 315211, China

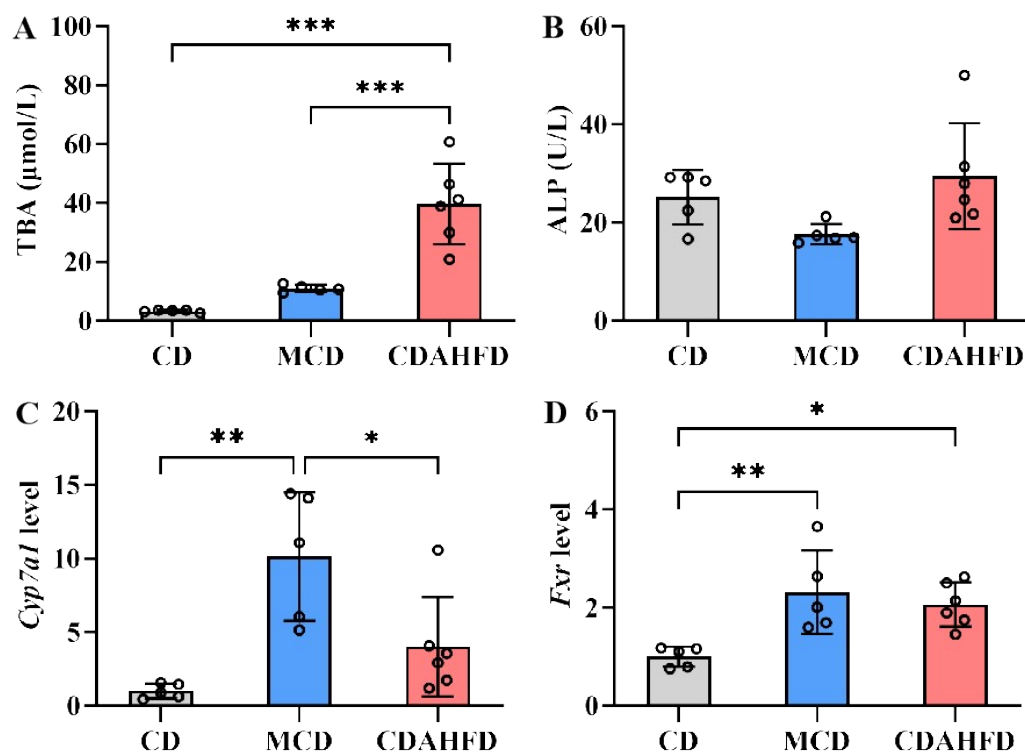

**Fig. S1** The overload of bile acid and their synthesis adaptation were more pronounced in CDAHFD-induced NASH. (A) Serum TBA level in mice. (B) Serum ALP level in mice. (C, D) The relative mRNA levels of *Cyp7a1* and *Fxr* were determined by qPCR and normalized with 18S. Data was expressed as mean  $\pm$  SD. \*  $P < 0.05$ , \*\*  $P < 0.01$ , \*\*\*  $P < 0.001$ , respectively.

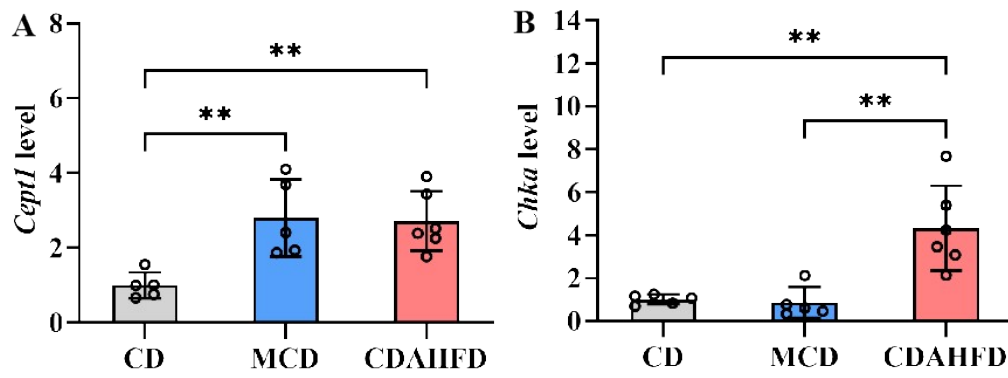

**Fig. S2** Effects of the MCD and CDAHFD diets on the transcription of genes involved PC synthesis.

(A, B) The relative mRNA levels of *Cept1* and *Chka* were determined by qPCR and normalized with

18S. Data was expressed as mean ± SD. \*  $P < 0.05$ , \*\*  $P < 0.01$ , \*\*\*  $P < 0.001$ , respectively.

**Table S1.** The ingredients and nutrient compositions of the diets used in this study.

| Ingredient (gm) | CD   | MCD   | CDAHFD |
|-----------------|------|-------|--------|
| L-Alanine       | 0    | 3.5   | 6.0    |
| L-Arginine      | 19.8 | 12.0  | 7.1    |
| L-Asparagine    | 0    | 5.9   | 0      |
| L-Aspartic Acid | 10   | 3.5   | 14.3   |
| L-Cystine       | 6.6  | 3.5   | 5.0    |
| L-Glutamine     | 0    | 39.6  | 45.0   |
| Glycine         | 10   | 23.1  | 3.5    |
| L-Histidine     | 8    | 4.5   | 5.4    |
| L-Isoleucine    | 14   | 8.1   | 9.0    |
| L-Leucine       | 28.8 | 11.0  | 18.6   |
| L-Lysine        | 16.4 | 17.8  | 15.6   |
| L-Phenylalanine | 10   | 7.4   | 9.9    |
| L-Proline       | 0    | 3.5   | 21.0   |
| L-Serine        | 10   | 3.5   | 11.8   |
| L-Threonine     | 13   | 8.1   | 8.5    |
| L-Tryptophan    | 3.8  | 1.8   | 2.5    |
| L-Tyrosine      | 12   | 5.0   | 10.8   |
| L-Valine        | 16.8 | 8.1   | 11.0   |
| Sucrose         | 140  | 451.1 | 203.7  |

|                     |      |       |       |
|---------------------|------|-------|-------|
| Corn Starch         | 0    | 148.6 | 90.9  |
| Maltodextrin 10     | 30.3 | 49.5  | 117.9 |
| Cellulose           | 150  | 29.7  | 58.9  |
| Corn Oil            | 20   | 99.1  | 0     |
| Soybean Oil         | 0    | 0     | 29.5  |
| Mineral Mix         | 24   | 34.7  | 11.8  |
| Sodium Bicarbonate  | 0    | 7.4   | 8.8   |
| Vitamin Mix         | 24   | 9.9   | 11.8  |
| L-Methionine        | 4    | 0     | 0.9   |
| Choline             | 2.5  | 0     | 0     |
| Cholesterol         | 20   | 0     | 10.3  |
| FD&C Yellow Dye #5  | 0    | 0     | 0.1   |
| Potassium Citrate   | 10   | 0     | 19.5  |
| Calcium Carbonate   | 16   | 0     | 6.5   |
| DiCalcium Phosphate | 10   | 0     | 15.3  |
| Lard                | 80   | 0     | 209.2 |
| crude ash           | 290  | 0     | 0     |
| Total (gm)          | 1000 | 1000  | 1000  |
| Kcal percentage (%) |      |       |       |
| Protein             | 18   | 16    | 18    |
| Carbohydrate        | 78   | 63    | 36    |

---

|           |     |     |     |
|-----------|-----|-----|-----|
| Fat       | 4   | 21  | 46  |
| Total (%) | 100 | 100 | 100 |

---

**Table S2.** The primer sequences used in the qPCR analysis in this study.

| Genes                          | Forward primer           | Reverse primer          |
|--------------------------------|--------------------------|-------------------------|
| <i>Srebf1</i>                  | TGACCCGGCTATTCCGTGA      | CTGGGCTGAGCAATACAGTTC   |
| <i>Plin2</i>                   | CTTGTGTCCTCCGCTTATGTC    | GCAGAGGTCACGGTCTTCAC    |
| <i>Abca1</i>                   | GCTTGTTGGCCTCAGTTAAGG    | GTAGCTCAGGCGTACAGAGAT   |
| <i>Il-2</i>                    | TGAGCAGGATGGAGAATTACAGG  | GTCCAAGTTCATCTTCTAGGCAC |
| <i>Tnf-<math>\alpha</math></i> | CCCTCACACTCAGATCATCTTCT  | GCTACGACGTGGGCTACAG     |
| <i>Il-10</i>                   | CTTACTGACTGGCATGAGGATCA  | GCAGCTCTAGGAGCATGTGG    |
| <i>Ccl2</i>                    | TTAAAAACCTGGATCGGAACCAA  | GCATTAGCTTCAGATTTACGGGT |
| <i>Cyclin D1</i>               | GCGTACCCTGACACCAATCTC    | CTCCTCTTCGCACTTCTGCTC   |
| <i>Cyclin E1</i>               | CTCCGACCTTTTCAGTCCGC     | CACAGTCTTGTCATCTTGGA    |
| <i>Cyclin B1</i>               | GCGTGTGCCTGTGACAGTTA     | CCTAGCGTTTTTGCTTCCCTT   |
| <i>Ki67</i>                    | ATCATTGACCGCTCCTTTAGGT   | GCTCGCCTTGATGGTTCCT     |
| <i>Pcyt1a</i>                  | GATGCACAGAGTTCAGCTAAAAGT | TGGCTGCCGTAAACCAACTG    |
| <i>Pemt</i>                    | ATCACCATTGTGTTCAACCCAC   | CCAGGGAATAGCAGGCTAGG    |
| <i>Lpcat</i>                   | GGCTCCTGTTGCTGCTTT       | TTCCTCCATAAGGCCAGGGG    |
| <i>Cept1</i>                   | ATGAGTGGGCATCGGTCAAC     | GTGGTGTCGGTAACTGAAACAA  |
| <i>Chka</i>                    | CAGGGGTGGTCTCAGTAACAT    | CGCAAGAGCACTTTCCGAG     |
| <i>Cpt1</i>                    | TGGCATCATCACTGGTGTGTT    | GTCTAGGGTCCGATTGATCTTTG |
| <i>Cpt2</i>                    | CAGCACAGCATCGTACCCA      | TCCAATGCCGTTCTCAAAT     |
| <i>Acox1</i>                   | CCGCCACCTTCAATCCAGAG     | CAAGTTCTCGATTTCTCGACGG  |
| <i>Cyp7a1</i>                  | GTCCGGATATTCAAGGATGC     | GGGAATGCCATTTACTTGGA    |

---

*Fxr*

GCTTGATGTGCTACAAAAGCTG

CGTGGTGATGGTTGAATGTCC

---



**Table S3.** Changed liver lipid metabolites in the MCD group versus the CDAHFD group.

| NO | Molecular Formula | Compound         | Rt(min) | [M+H] <sup>+</sup> m/z |
|----|-------------------|------------------|---------|------------------------|
| 1  | C21H35NO8         | AC(14:3;O4)      | 0.877   | 430.24179              |
| 2  | C33H53NO4         | AC(26:6)         | 1.387   | 528.40918              |
| 3  | C39H69NO5         | AC(32:4;O)       | 11.872  | 632.52179              |
| 4  | C30H57NO4         | Cer(30:2;O3)     | 2.64    | 496.42206              |
| 5  | C36H71NO5         | Cer(36:1;O4)     | 2.379   | 598.49377              |
| 6  | C36H62O5          | DG(33:4)         | 13.821  | 575.50781              |
| 7  | C38H64O5          | DG(35:5)         | 16.275  | 601.51599              |
| 8  | C50H97NO13        | Hex2Cer(38:0;O2) | 16.271  | 920.69122              |
| 9  | C41H75NO8         | HexCer(35:3;O2)  | 2.979   | 710.60345              |
| 10 | C45H81NO10        | HexCer(39:4;O4)  | 11.464  | 796.56824              |
| 11 | C47H83NO9         | HexCer(41:5;O3)  | 8.975   | 806.61908              |
| 12 | C50H97NO10        | HexCer(44:1;O4)  | 16.527  | 872.76288              |
| 13 | C39H68NO14P       | IPC(33:5;O5)     | 9.033   | 806.44476              |
| 14 | C40H80NO13P       | IPC(34:0;O4)     | 13.822  | 814.54156              |
| 15 | C42H84NO11P       | IPC(36:0;O2)     | 12.05   | 810.58716              |
| 16 | C40H80NO8P        | PC(32:0)         | 12.656  | 734.57214              |
| 17 | C42H80NO8P        | PC(34:2)         | 10.527  | 758.54956              |
| 18 | C42H78NO8P        | PC(34:3)         | 8.719   | 756.55597              |
| 19 | C44H86NO8P        | PC(36:1)         | 13.75   | 788.60742              |
| 20 | C46H80NO8P        | PC(38:6)         | 8.608   | 806.56097              |

---

|    |             |             |        |           |
|----|-------------|-------------|--------|-----------|
| 21 | C48H84NO8P  | PC(40:6)    | 12.06  | 834.60004 |
| 22 | C48H82NO8P  | PC(40:7)    | 9.228  | 832.57965 |
| 23 | C43H84NO7P  | PC(O-35:2)  | 10.315 | 758.58905 |
| 24 | C41H80NO8P  | PE(36:1)    | 13.933 | 746.56024 |
| 25 | C46H80NO8P  | PE(41:6)    | 8.877  | 806.57257 |
| 26 | C43H84NO7P  | PE(O-38:2)  | 10.378 | 758.60028 |
| 27 | C47H84NO7P  | PE(O-42:6)  | 8.182  | 806.57257 |
| 28 | C43H84NO10P | PS(37:0)    | 9.094  | 806.57257 |
| 29 | C44H72NO10P | PS(38:7)    | 8.993  | 806.51447 |
| 30 | C45H88NO10P | PS(39:0)    | 12.229 | 834.59412 |
| 31 | C45H86NO10P | PS(39:1)    | 8.735  | 832.57965 |
| 32 | C46H76NO10P | PS(40:7)    | 9.252  | 834.49951 |
| 33 | C41H76NO9P  | PS(O-35:3)  | 10.86  | 758.54956 |
| 34 | C46H93N2O6P | SM(41:1;O2) | 14.643 | 801.68713 |
| 35 | C47H95N2O6P | SM(42:1;O2) | 14.839 | 815.69824 |

---

**Abbreviations:** AC, acyl carnitine; Cer, ceramide; DG, diglyceride; Hex2Cer, dihexosylceramide; HexCer, hexosylceramide; IPC, inositol phosphorylceramide; PC, phosphatidylcholine; PE, phosphatidylethanolamine; PE, phosphatidylethanolamine; PS, phosphatidylserine; SM, sphingomyelin.
