# Supplementary figures and images for: A CDAHFD-induced mouse model mimicking human NASH in the metabolism of hepatic phosphatidylcholines and acyl carnitines
Source: Royal Society of Chemistry journal article supplement (doi:10.1039/d3fo05111k), 2024-01-01

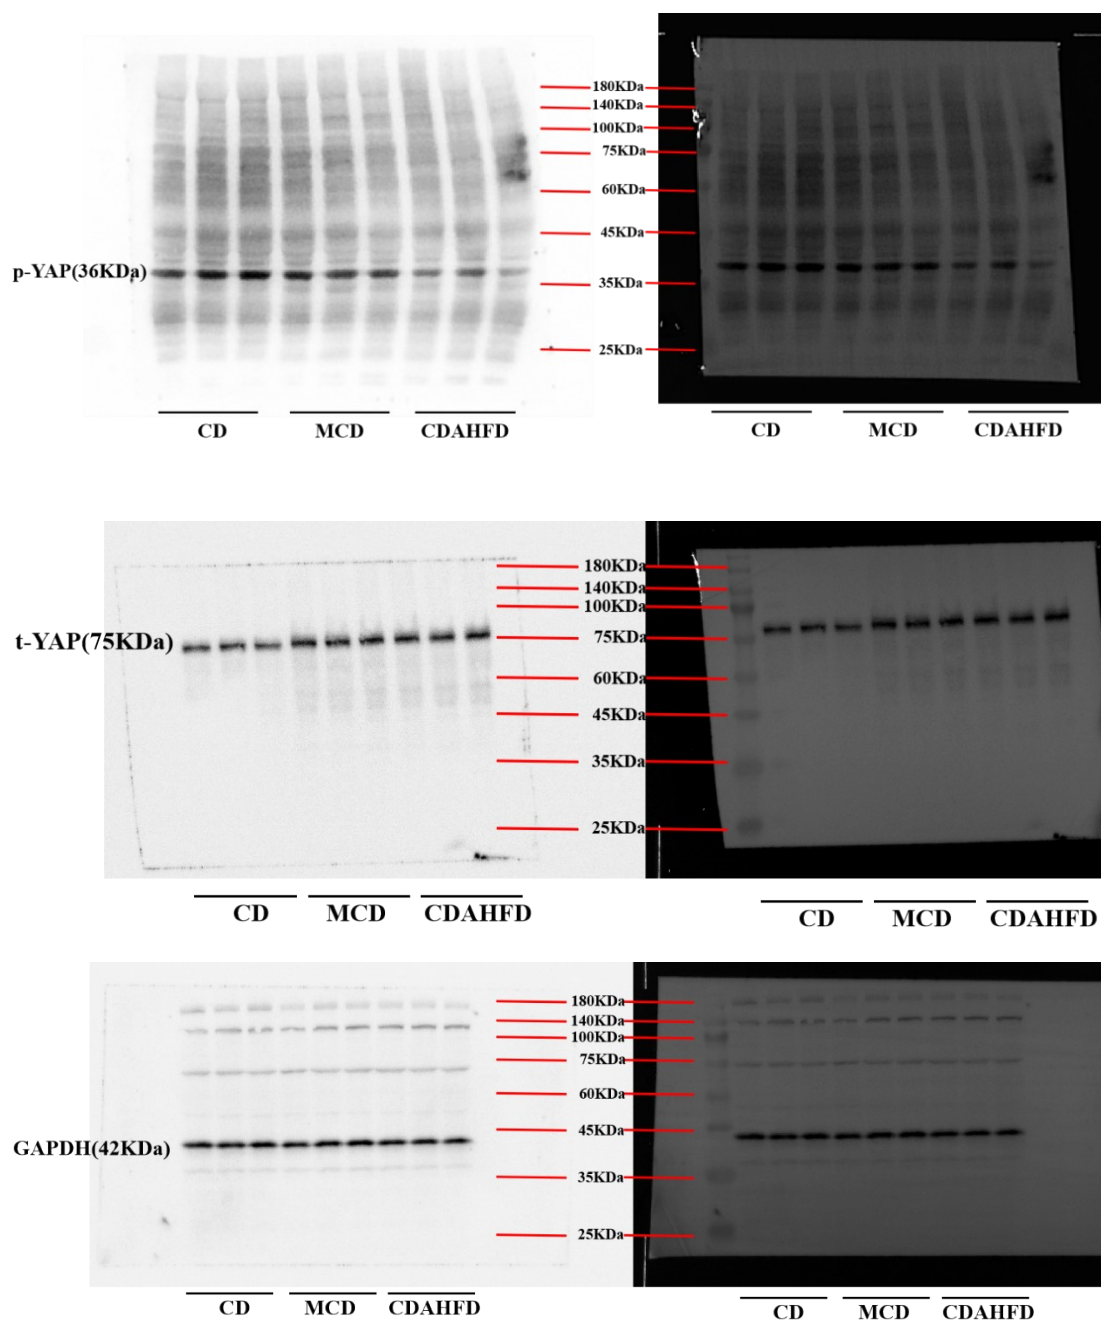

The raw images of western blot in Fig. 4A.

Supplement: d3fo05111k2.pdf [file d3fo05111k2.pdf]
